# Supplementary material
Source: HighWire-hosted journal article supplement (https://svn.smart01.highwire.org/content/svn-2024-003142)
Supplement: inline-supplementary-material-1 [file inline-supplementary-material-1.pdf]

### **Online supplemental material**

#### **Definition of secondary outcomes**

Major bleeding was defined according to the International Society on Thrombosis classification as overt bleeding with  $\geq 2$  g/dL decrease in hemoglobin level or requiring transfusion of  $\geq 2$  units of red blood cells/whole blood or occurring in a critical site, or contributing to death. *Patel MR, Mahaffey KW, Garg J, Pan G, Singer DE, Hacke W, Breithardt G, Halperin JL, Hankey GJ, Piccini JP, et al. Rivaroxaban versus warfarin in nonvalvular atrial fibrillation. N Engl J Med. 2011;365:883-891. doi: 10.1056/NEJMoa1009638*

Death was categorized into cardiovascular related or non-cardiovascular related. Procedure related death was defined as all-cause mortality during the index procedure, any procedure-related death within 30 days after the index procedure or during post-operative hospitalization for the index procedure (if >30 days). *Tzikas A, Holmes DR, Jr., Gafoor S, Ruiz CE, Blomstrom-Lundqvist C, Diener HC, Cappato R, Kar S, Lee RJ, Byrne RA, et al. Percutaneous left atrial appendage occlusion: the Munich consensus document on definitions, endpoints, and data collection requirements for clinical studies. Europace. 2017;19:4-15. doi: 10.1093/europace/euw141*

Supplementary Table 1. Published data on baseline characteristics and outcomes in patients who had left atrial appendage closure after ICH

| Author, year, <i>Journal</i>                           | Study design                                                     | Num. of pts | Classification to ICH major subtype                         | Age      | CHA <sub>2</sub> DS <sub>2</sub> -VASc | HAS-BLED | Follow-up period (mean, months) | Recurrent AIS risk per 100 patient-years | Recurrent ICH risk per 100 patient-years |
|--------------------------------------------------------|------------------------------------------------------------------|-------------|-------------------------------------------------------------|----------|----------------------------------------|----------|---------------------------------|------------------------------------------|------------------------------------------|
| Abramovitz-Fouks, 2023 (Current dataset)               | Retrospective, observational (2015-2021)                         | 146         | 58 IPH, 40 T-ICH, 18 Non-traumatic SDH, 4 SAH, 24 CMB-group | 75.6±7.6 | 5.2±1.5                                | 3.6±1.0  | 25.4                            | 1.94                                     | 1.94                                     |
| Gilhofer, 2023, <i>Canadian Journal of Cardiology</i>  | Retrospective, observational (2010-2022)                         | 138         | 57 SDH, 16 SAH, 64 IPH, 17 CAA                              | 76.1±8.5 | 4.4±1.5                                | 3.7±0.9  | 14.7                            | 1.4                                      | 1.5                                      |
| Schrag, 2021, <i>Translational Stroke Research</i>     | Observational, severe CAA cohort with or without ICH (2016-2020) | 26          | 13 with ICH, 13 without ICH                                 | 73.0±8.5 | 4.6±1.5                                | 3.8±1.0  | 25                              | 1.8                                      | 1.8                                      |
| Casu, 2020, <i>International Journal of Cardiology</i> | Retrospective, observational (2014-2019)                         | 120         | 90 IPH, 20 SDH, 10 SAH                                      | 74±8.6   | 4.5±1.5                                | 3.5±1.1  | 16.1                            | 1.8                                      | 3.63                                     |

|                                                                          |                                               |     |                        |            |           |           |             |      |      |
|--------------------------------------------------------------------------|-----------------------------------------------|-----|------------------------|------------|-----------|-----------|-------------|------|------|
| Ajmal, 2020, <i>Journal of Stroke and Cerebrovascular Diseases</i>       | Retrospective, observational (3 years period) | 16  | 7 IPH,7 SDH, 2 SAH     | 73 (67-78) | 4 (3-6)   | N/A       | 11.2        | 7    | N/A  |
| Pouru, 2020, <i>Heart rythm</i>                                          | Prospective registry (2009-2018)              | 104 | 69 IPH ,21 SDH, 11 SAH | 73 ± 7     | 4.7 ± 1.4 | 3.3 ± 0.9 | 43.2        | 2.1  | 1.8  |
| Boersma, 2019, <i>Circulation: Arrhythmia and Electrophysiology</i>      | Prospective EWOLUTION registry                | 153 | N/A                    | 91% >65    | 5.4±1.2   | 2.8±0.9   | 24          | 1.8  | 1.8  |
| Hucker, 2019, <i>Journal of Interventional Cardiac Electrophysiology</i> | Retrospective, observational (2015-2018)      | 63  | 36 IPH, 18 SDH, 6 SAH  | 75.3 ± 6.0 | 4.9 ± 1.7 | 3.5 ± 1.1 | 6           | 0    | 0    |
| Hutt, 2019, <i>Heart Rythm</i>                                           | Prospective registry (2015-2018)              | 38  | 23 IPH, 9 SDH, 6 SAH   | 73 ± 7     | 5.0 ± 1.3 | 4.2 ± 1.0 | 13.4 months | 0    | 0    |
| Nielsen-Kudsk, 2017, <i>Eurointervention</i>                             | Retrospective, observational (2009-2015)      | 151 | N/A                    | 71.9 ± 8.7 | 3.9 ± 1.5 | 4.2 ± 0.8 | 6.1         | 1.73 | 0.86 |

|                                                                    |                                                    |     |                                         |            |             |            |      |      |                         |
|--------------------------------------------------------------------|----------------------------------------------------|-----|-----------------------------------------|------------|-------------|------------|------|------|-------------------------|
| Tzikas, 2017, <i>International Journal of Cardiology</i>           | Prospective Amplatzar cardiac registry (2008-2013) | 198 | N/A                                     | 73.7 ± 8.4 | 4.5±1.5     | 3.5 ± 1.1  | 18.4 | 1.4  | 0 (1 that sub-clinical) |
| Renou, 2017, <i>Journal of Stroke and Cerebrovascular Diseases</i> | Prospective, observational (2011-2015)             | 46  | 25 lobar, 18 deep hemorrhage, 3 cmb±cSS | 73.7 ± 8.4 | 5.23±1.12   | 4.00 ±0.95 | 12.6 | 4.14 | 2.07                    |
| Fayos-Vidal, 2017, <i>Neurología</i>                               | Retrospective, observational (2013-2016)           | 9   | 1 lobar, 7 Deep hemorrhage, 1 SDH       | 72.7 ± 8.2 | 4 (IQR 2.5) | 3          | 15   | 0    | 0                       |
| Cruz-Gonzalez, 2016, <i>Scientific letter / Rev Esp Cardiol</i>    | Retrospective, observational (2009-2016)           | 47  | 34 ICH, 10 SDH, 2 SAH, 1 cmb            | 80±6       | 5±1         | 4±1        | 28   | 2.2  | 2.2                     |
| Fahmy, 2016, <i>Candian Journal of Cardiology</i>                  | Retrospective, observational (2010-2015)           | 26  | 24 ICH, 2 IOH                           | 76±7.0     | 4.9 ± 1.7   | N/A        | 11.9 | 0    | 0                       |
| Hortsmann, 2014, <i>Neurology</i>                                  | Prospective, observational (2010-2022)             | 20  | 15 ICH, 4 SDH, 1 SAH                    | 72.5±5.8   | 4.5±1.4     | 4.7 ±. 1.0 | 13.6 | 0    | 0                       |

Some of these studies were summarized in a review article from year 2020.(32) ICH, intracerebral hemorrhage; AIS, acute ischemic stroke; IPH, intraparenchymal hemorrhage; T-ICH, traumatic ICH; SDH, sub-dural hemorrhage; SAH, subarachnoid hemorrhage; cmb, cerebral microbleed; CAA, cerebral amyloid angiopathy; cSS, cortical superficial siderosis; IOH, intraocular hemorrhage
